# Supplementary material for: Towards Cyber Physical Era: Soft Computing framework based Multi-Sensor Array for Water Quality Monitoring
Source: Copernicus journal article supplement (doi:10.5194/dwes-2017-25), 2017-08-18
Supplement: Supplementary file 1 [file dwes-2017-25-supplement.zip]

Archive with 7 entries (6 files):
- Supplement Material/
- Supplement Material/Arduino Code for Single Parameter.ino
- Supplement Material/Live Data Visualisation Clip.mp4
- Supplement Material/Live Sensor Data.pdf
- Supplement Material/Mf for All parameters.pdf
- Supplement Material/pH monitoring from Python.py
- Supplement Material/Python Code PDF.pdf
