# Supplementary material for: Towards Cyber Physical Era: Soft Computing framework based Multi-Sensor Array for Water Quality Monitoring
Source: Copernicus journal article supplement (doi:10.5194/dwes-2017-25), 2017-08-18
Supplement: Supplementary file 1 [file dwes-2017-25-supplement.zip › Supplement Material/Live Sensor Data.pdf]

Live Sensor Data (Continuous), Not Presented in research paper due to space constraint.

This data can be visualize live for all the five parameters (Application of Python Framework)

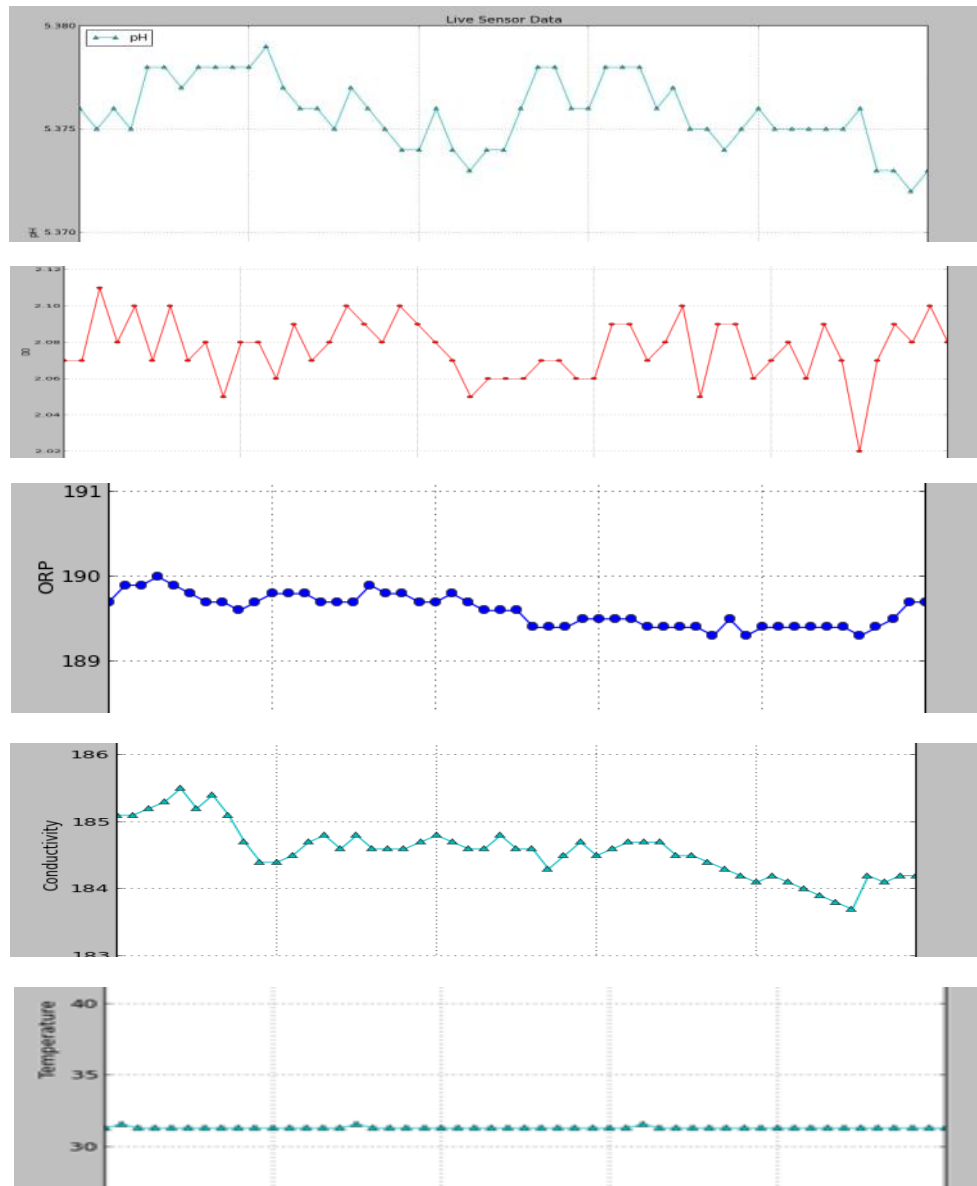

Fig 3: Python Frame work based User Interface Real Time Online Monitoring
