# Supplementary material for: Towards Cyber Physical Era: Soft Computing framework based Multi-Sensor Array for Water Quality Monitoring
Source: Copernicus journal article supplement (doi:10.5194/dwes-2017-25), 2017-08-18
Supplement: Supplementary file 1 [file dwes-2017-25-supplement.zip › Supplement Material/Mf for All parameters.pdf]

Mf of all parameters (Only two presented in research paper due to space limitation, rest are in supplementary material)

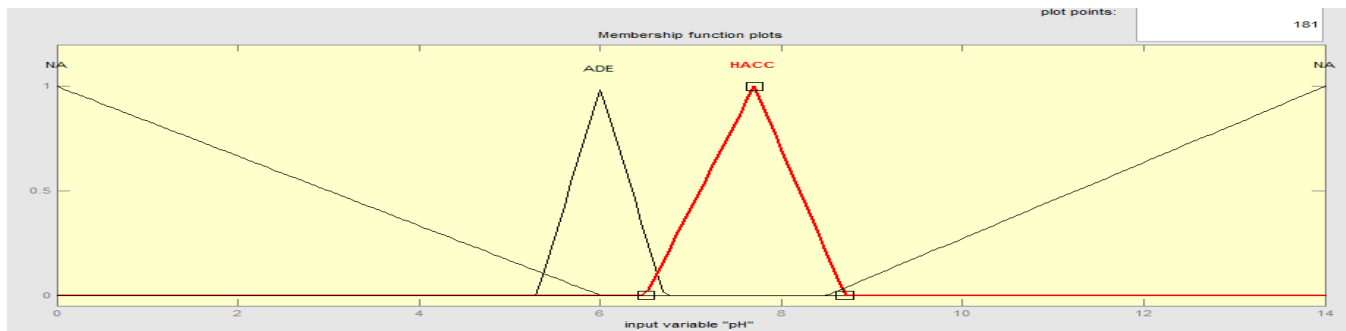

a.) Fuzzy mf for pH

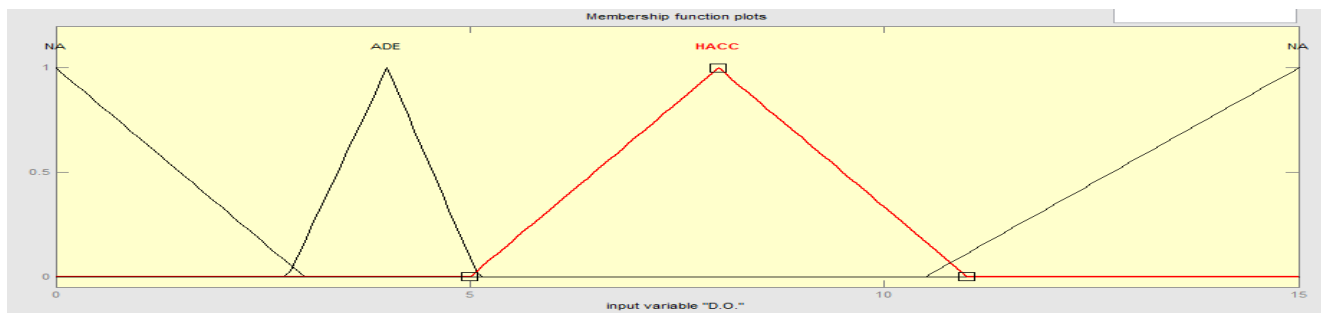

b.) Fuzzy mf for Dissolved Oxygen

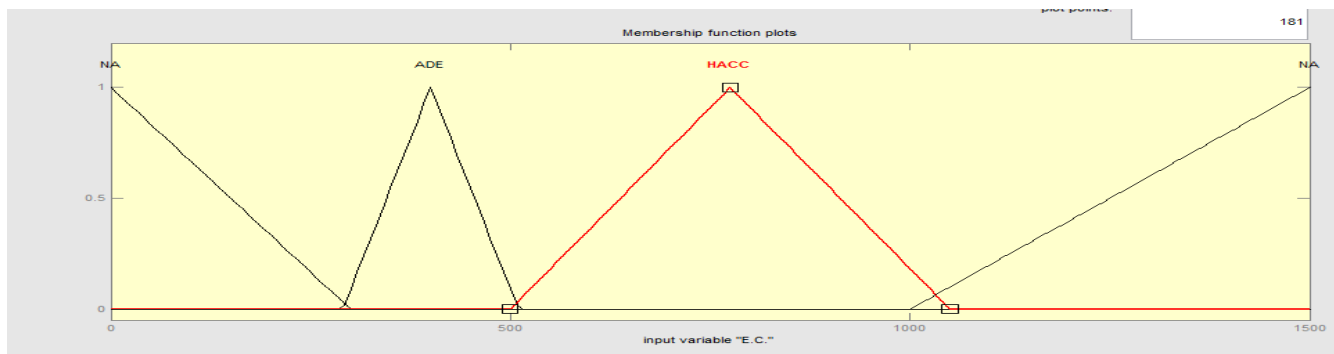

c.) Fuzzy mf for Electrical Conductivity

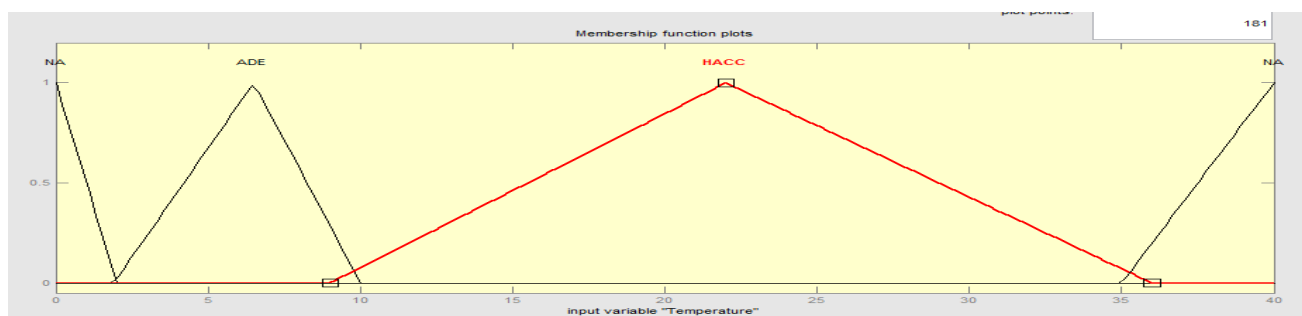

d.) Fuzzy mf for Temperature

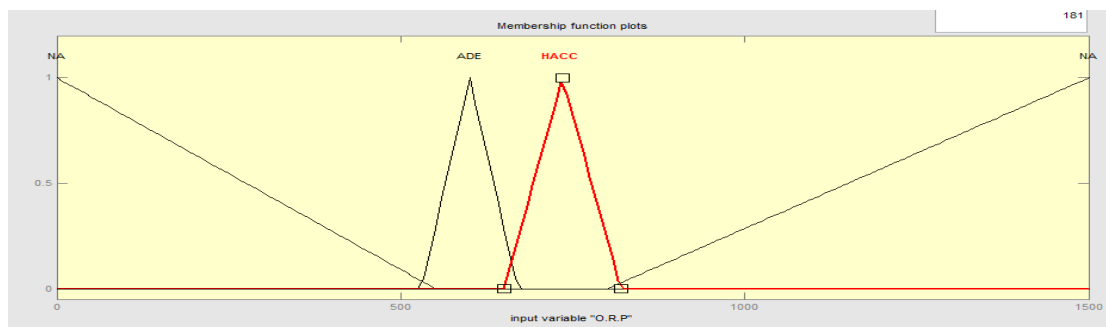

e.) Fuzzy mf for ORP
